# Supplementary material
Source: MDPI journal article supplement (https://www.mdpi.com/2073-4441/14/23/3827)
Supplement: s1 [file s1 › water-1989106-supplementary.pdf]

# Construction of Highly Efficient $\text{Zn}_{0.4}\text{Cd}_{0.6}\text{S}$ and Cobalt Antimony Oxide Heterojunction Composites for Visible-Light-Driven Photocatalytic Hydrogen Evolution and Pollutant Degradation

Chen Chen <sup>1,\*</sup>, Xiao Zhang <sup>2,3</sup>, Ting Cheng <sup>2</sup>, Mingyue Wen <sup>1</sup>, Yuan Tian <sup>1</sup> and Baoxuan Hou <sup>1</sup>

<sup>1</sup> School of Environmental and Chemical Engineering, Jiangsu University of Science and Technology, Zhenjiang 212100, China

<sup>2</sup> School of Environmental Ecology, Jiangsu City Vocational College, Nanjing 210017, China

<sup>3</sup> Yancheng Academy of Environmental Technology and Engineering, Nanjing University, Yancheng 224000, China

\* Correspondence: chenc@just.edu.cn

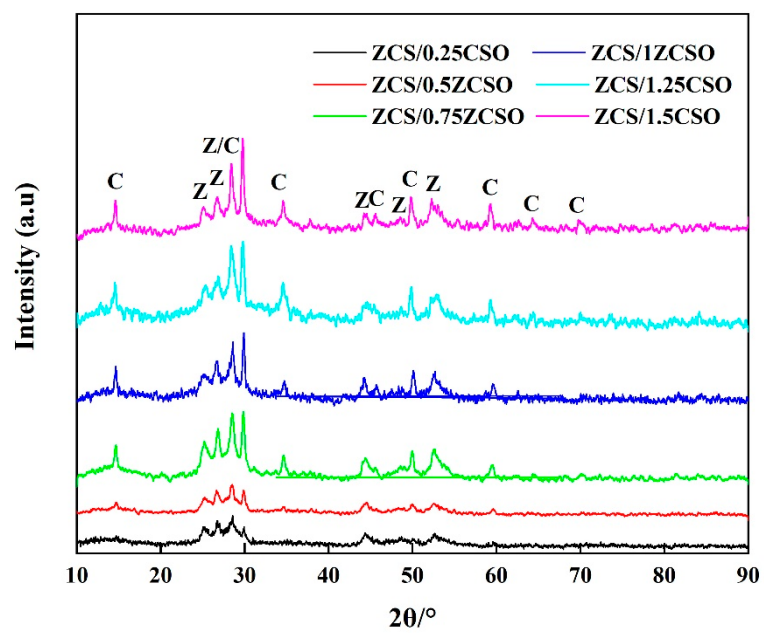

Figure S1. XRD patterns of ZCS/CSO heterojunction with different mass ratio (Z: ZCS and C: CSO).

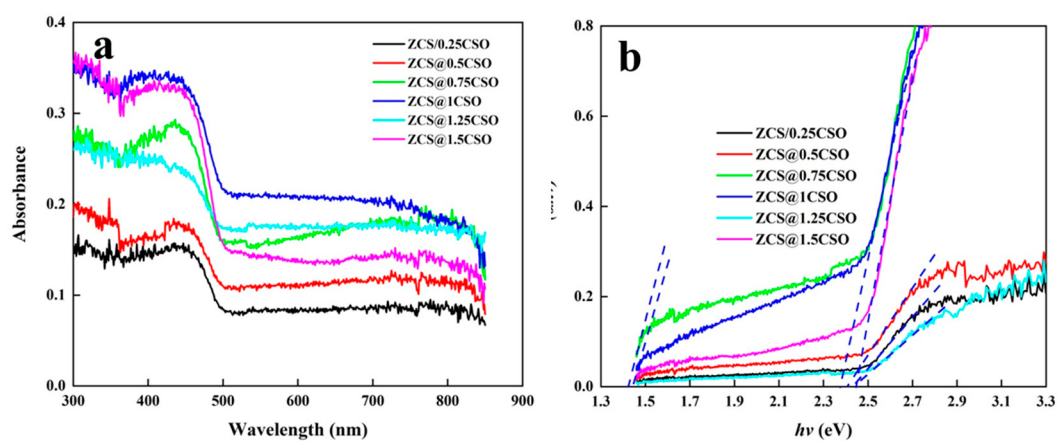

**Figure S2.** UV-Vis diffuse reflectance spectra for ZCS/CSO heterojunction with different mass ratio (a), and the plotting results of band gaps energy for ZCS/CSO heterojunction with different mass ratio (b).

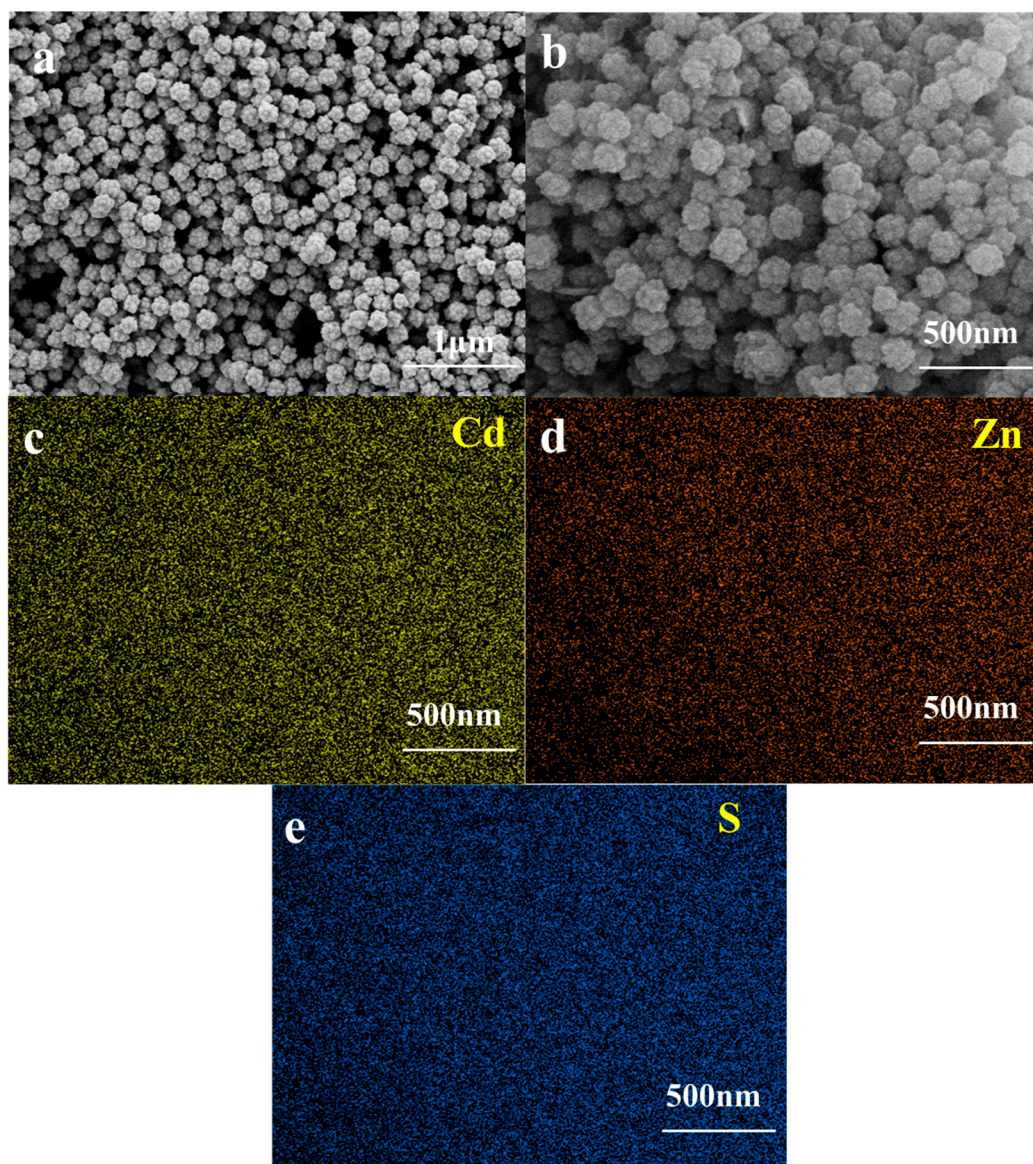

**Figure S3.** The SEM analysis results of ZCS (a and b) and EDS mapping results of Cd (c), Zn (d) and S (e).

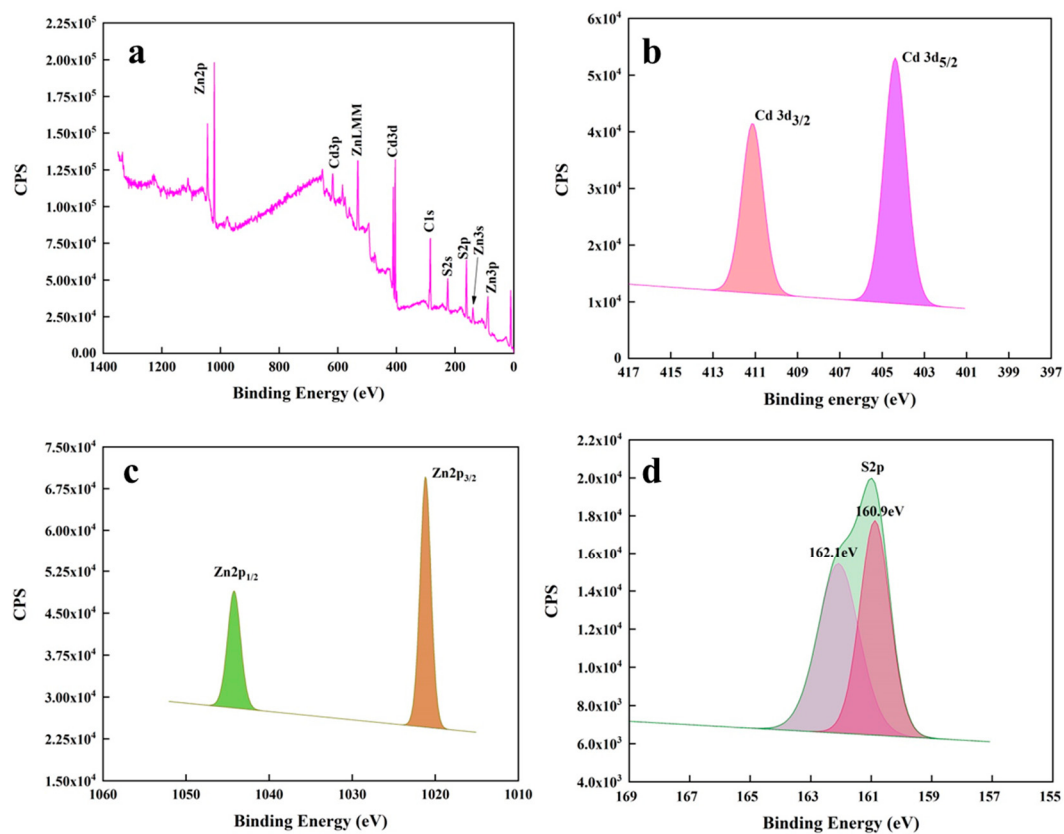

Figure S4. The wide scan XPS of ZCS (a); the high-resolution XPS spectra of Cd3d (b), Zn2p (c) and S2p (d).

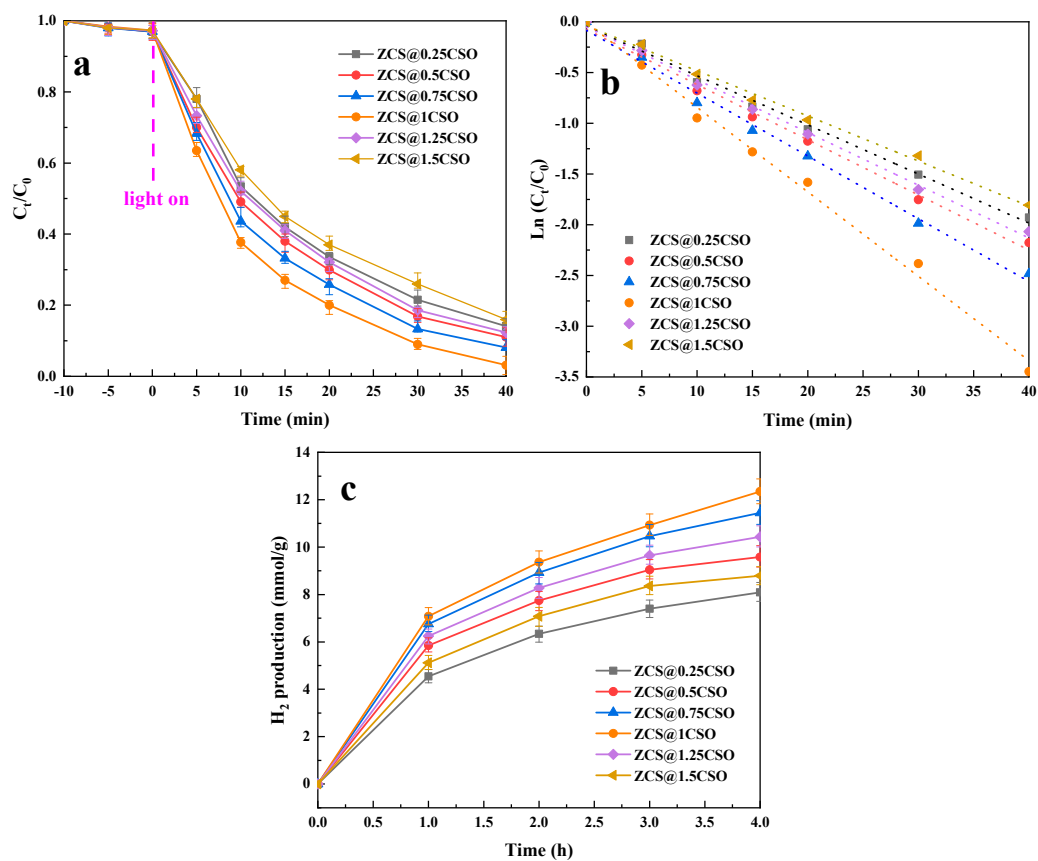

**Figure S5.** The MB photocatalytic degradation process (a), kinetic analysis (b) and H<sub>2</sub> production (c) under composite systems (with different ZCS and CSO ratios).

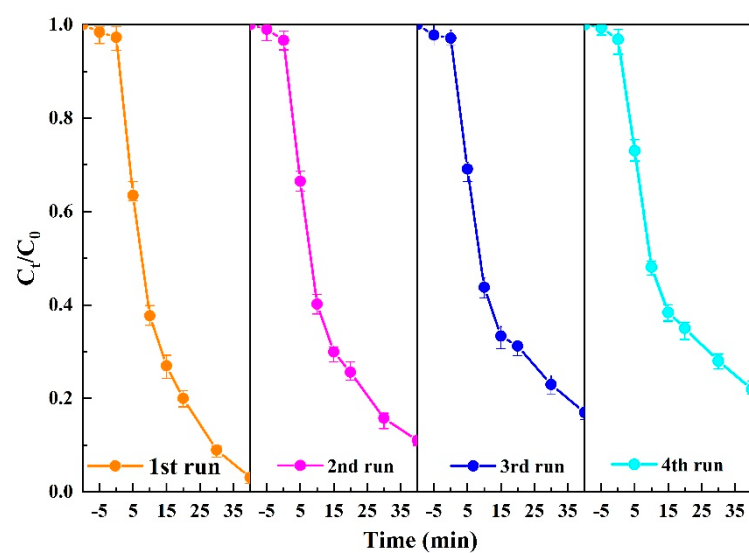

**Figure S6.** The MB photocatalytic degradation efficiency under ZCS@1CSO system for four runs.

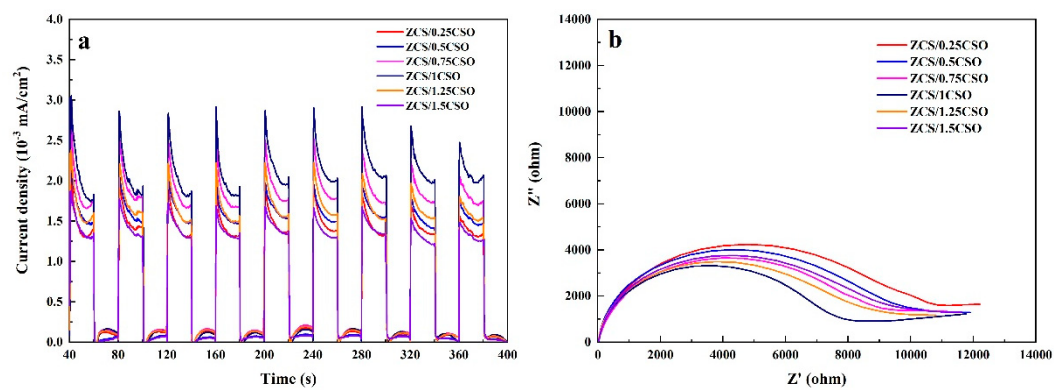

**Figure S7. The transient photocurrent responses (a), Electro-chemical impedance spectra (b) for ZCS/CSO heterojunction with different mass ratio.**
